# Supplementary material
Source: PubMed Central journal article supplement (PMC3793626)
Supplement: supp_D042226_jlr.D042226-1.pdf [file supp_D042226_jlr.D042226-1.pdf]

**Supplemental Table 1: Hydroxylating activity of CYP52M1 against various fatty acids.**

(- no hydroxylation; + <10% substrate conversion, ++ 10–25% substrate conversion).

| Fatty acid                        | Activity |
|-----------------------------------|----------|
| C12:0                             | -        |
| C14:0                             | -        |
| C16:1 <sup>Δ9</sup>               | ++       |
| C16:0                             | ++       |
| C18:3 <sup>Δ6, Δ9, Δ12</sup>      | ++       |
| C18:3 <sup>Δ9, Δ12, Δ15</sup>     | ++       |
| C18:2 <sup>Δ9, Δ12</sup>          | ++       |
| C18:1 <sup>Δ9</sup>               | ++       |
| C18:0                             | ++       |
| C20:4 <sup>Δ5, Δ8, Δ11, Δ14</sup> | +        |
| C20:1 <sup>Δ11</sup>              | +        |
| C20:0                             | -        |
| C22:0                             | -        |

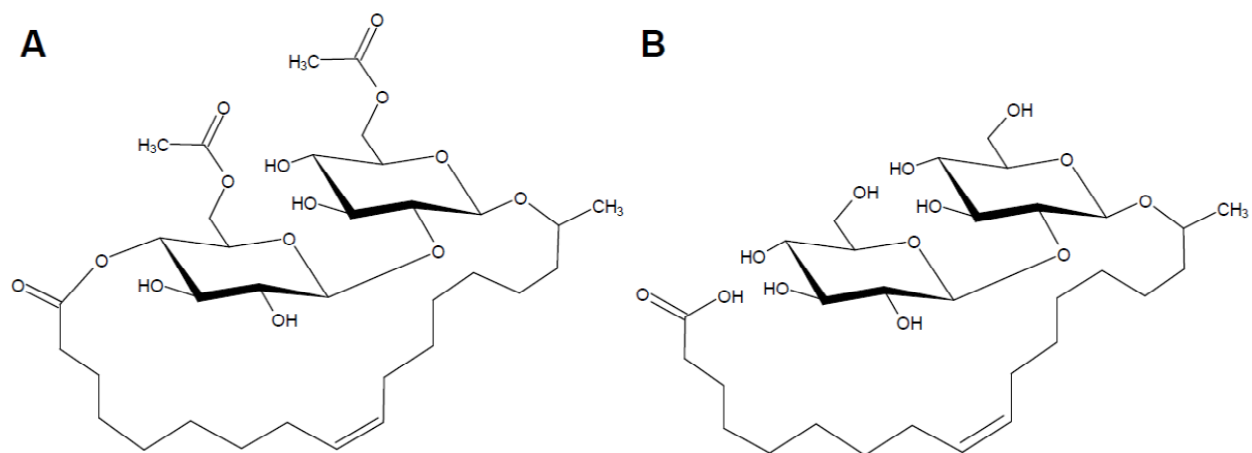

**Fig. S1.** Examples of sophorolipids produced by *S. bombicola*. (A) diacetylated lactonic sophorolipid, (B) non-acetylated open-chain sophorolipid.

```

      10      20      30      40      50      60      70      80      90     100
CYP52M1  MLIKDIILTPMSTSAVAGLLPFLVFAFLVLEPIWLLWYRYAARRHKCSMPRETEKSFPLGIQRTMDMIKTAKSYTLLLEVQYDRVFNKFKARTYLRQAPL
CYP4A11  MSVSVLSPSRL-LGDVSGILQAASLLILLIKAVQLYLHROWL-LKALQQEPCPP-SHWLFGHIQELQDDQE----LQRIQKVVETFPACPHWLWGG
CYP4F2   --MSQLSLSWLGLWVVAASFWLLLLLVGASWLLAHVLAWTYAFYDNCRRRLRCEPQPPRRNWFVGHQGMVNPTEEG---MRVLTQLVATYPQGFKVMWGP

      110     120     130     140     150     160     170     180     190     200
CYP52M1  QYQIFTEIENIKTILATKFN-DFGLGARFHTVGKVFQGGIFTLSCNGFKQSRSMIRPQETKDQVCRIDQISSHAAELIKEMNRAMK--VDQFIDVQHYF
CYP4A11  KVRVQLYDFDYMKVILGRS---DPKSHGSRFLAPWICYGLLLNCGTWFQHRRLMTPAFHYDILKPYVGLMADSVRVMLDKWEELLGQDSP-LEVFOHV
CYP4F2   SPLLSLCHPDIIIRSVINASAAIAPKDKFFYSFLEFWLGDGLLSACDKNSRHRRLMTPAEHFNIIKPYMKIFNESVNIIMHAKWQLLASEGSACLDMFEHI

      210     220     230     240     250     260     270     280     290     300
CYP52M1  HKLTLDTATEEFLGESCESLNPENQSCIVARDGSEITAEQFVESYNFLNLYAFKRTLSSKVYWLFNSEKFRDHKKRAQSYIDYVVKAIYATSFAAENSI
CYP4A11  SLMTLDTIMKCAFESHQGSIQVDRNSQSYIQ-AISDLNVLVFSRVNNAFHQNDTIYSLTSAGRWTHRACQLAHQHTDQVIQLR---KAQIQKEGE---LEK
CYP4F2   SLMTLDLSLQKCVESFDSHCQE--KPSEYIA-AILELSALVSKRHHEILLHIDFLYLLTPDGQRFRRACRLVHDFDAVIQER---RRTPSQGVDDFLQA

      310     320     330     340     350     360     370     380     390     400
CYP52M1  AEKDAEAESSGIYVFSLEMAKVTRDPVTTFDQIFNIIAGRDTTAATLSFAIHFILARNPDVFNKLRREVLDFHGTKEEQRPLSFELIKQAPYLKQVINQV
CYP4A11  IKRRRHLDFLDILLAKMENGSLSDKDLRAEVDTFMFECHDTTASGTSWILYALATHPKHQERCREEIHSLLDG---ASITWNHLDQMPYTTMCIKSA
CYP4F2   KAKSKTLDFTDVLILLSKDEDGKLSDEDIRAEADTFMFECHDTTASGLSNVLYHLAKHPEYQERCROEVQELLKDRE-PKEIEWDDLHLPLFLTMCKES

      410     420     430     440     450     460     470     480     490     500
CYP52M1  LRLAPVLPINFRFAVRDITLPIGGPEQKDPFVFPKGTAVYYSIYMVHRDIKYWCPDAHEFNPNRWENL--KLDNVWAFIPFNGCPRIICIQOQFALTELS
CYP4A11  LRLVPPVPGIGRELSTPVTFPDGRS-----LPKGLMVLISYGLHHPKVW-PNPEVDFPFRFAPG--SAQSHAEIPFSGCSRNCICKQFAMNELK
CYP4F2   LRLVPPVVISRHVTQDIVLPDGRV-----LPKGIICLISVFGTHTNPAVW-PDPEVYDFPFRFDPENIKERSPLAIPFSAGPRNCIGOTFAMAEMK

      510     520     530     540     550
CYP52M1  LTLVRLQEYSKIEMGPDFEESPRFSTTITTAQHAPPGVVVRF-----
CYP4A11  VATALTLRFELLDPTRIEIPI-ARLVKSKNGIHLRLRRLPNPCEDKDQL
CYP4F2   VVLALTLRFERVLDPHT-ERRK-PELVIRAEGLWLRVEPLS-----

```

**Fig. S2.** Alignment of the CYP52M1 protein (Genbank Accession Number EU552419) with human CYP4A11 (Genbank Accession Number AAA58436) and CYP4F2 (Genbank Accession Number AAI36300). Multiple sequence alignments were made with the CLUSTAL W program.

$^1\text{H}$  NMR of purified  
**20-HETE** peak

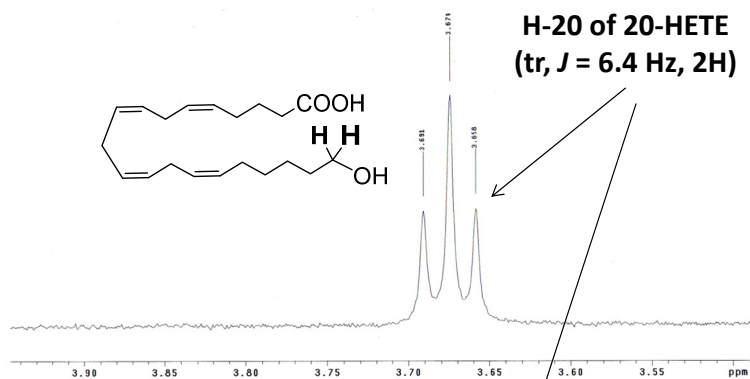

$^1\text{H}$  NMR of flash  
column fraction  
containing  
**19/20-HETE**

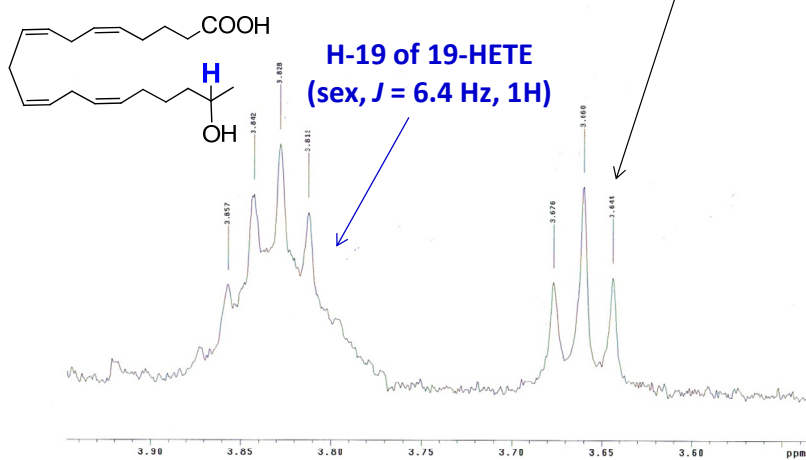

**Fig. S3.** 19- and 20-HETE show characteristic signals at  $\delta$  3.6-3.9 ppm.

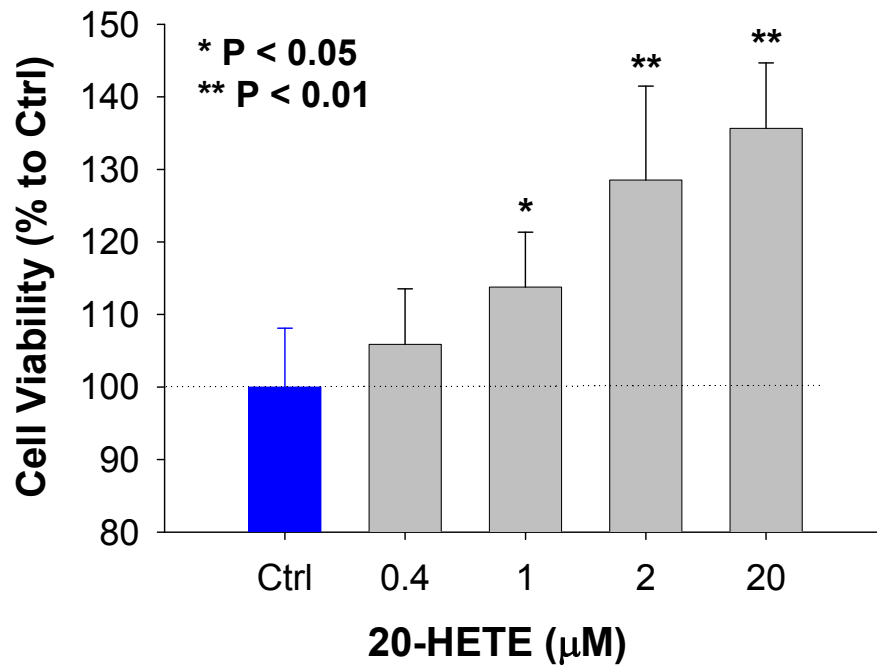

**Fig. S4.** 20-HETE increased endothelial cell proliferation in HUVECs after 18 h treatment. The HUVECs were serum-starved for 24h, then treated with 20-HETE in basal medium for 18 h, cell viability was assessed by a MTT assay.
